# Supplementary material for: Comparative genomics of metabolic capacities of regulons controlled by cis-regulatory RNA motifs in bacteria
Source: PubMed Central journal article supplement (PMC3766115; doi:10.1186/1471-2164-14-597), 2013-09-02
Supplement: 1471-2164-14-597-S4.pdf [file 1471-2164-14-597-S4.pdf]

Additional File 4. Total number of genes controlled by predicted RNA motif regulons in 24 taxonomic groups of Bacteria.

| Taxonomic group (number of genomes) | Group A - Widely distributed RNA motifs |             |            |            |            | Group B Moderately distributed RNA motifs |            |            |            |            |            |            |           |           |            |           | Group C Phylogenetically restrictive RNA motifs |           |           |           |           |           |           |           |           |           |           | Group D Ribosomal operon leaders |           |           |          |           |           | Group E - a.a. operon leaders |            |            |           | Group F T-boxes | Total genes |            |            |            |             |              |             |
|-------------------------------------|-----------------------------------------|-------------|------------|------------|------------|-------------------------------------------|------------|------------|------------|------------|------------|------------|-----------|-----------|------------|-----------|-------------------------------------------------|-----------|-----------|-----------|-----------|-----------|-----------|-----------|-----------|-----------|-----------|----------------------------------|-----------|-----------|----------|-----------|-----------|-------------------------------|------------|------------|-----------|-----------------|-------------|------------|------------|------------|-------------|--------------|-------------|
|                                     | TPP                                     | Cobalamin   | Glycine    | FMN        | yypP-ykoY  | SAM                                       | Lysine     | Purine     | PyrR       | GEMM       | MOCO       | PreQ1      | ydaO-yuaA | mini-ykkC | ykkC-ykkD  | glmS      | ykoK                                            | SAH       | THF       | yIbH      | preQ1-II  | sucA      | Mg sensor | SAM-IV    | SAM alpha | SAM-SAH   | SAM       | Chlorobi                         | Smk box   | serC      | speF     | ybhL      | glnA      | S15                           | L10        | L20        | L21       | L19             |             | L13        | Trp        | His        | Leu         | Thr          | All T-boxes |
| Lactobacillaceae (15)               | 100                                     | 1           | 0          | 34         | 13         | 2                                         | 74         | 25         | 122        | 0          | 0          | 13         | 0         | 0         | 3          | 1         | 15                                              | 0         | 8         | 0         | 3         | 0         | 0         | 0         | 0         | 0         | 0         | 0                                | 13        | 0         | 0        | 0         | 0         | 9                             | 30         | 45         | 39        | 14              | 26          | 0          | 0          | 0          | 0           | 484          | 1074        |
| Streptococcaceae (15)               | 62                                      | 0           | 12         | 42         | 16         | 0                                         | 4          | 24         | 122        | 0          | 0          | 4          | 0         | 0         | 0          | 0         | 6                                               | 0         | 5         | 0         | 14        | 0         | 0         | 0         | 0         | 0         | 0         | 0                                | 0         | 0         | 0        | 0         | 0         | 15                            | 30         | 45         | 38        | 13              | 30          | 0          | 0          | 0          | 0           | 399          | 881         |
| Bacillales (11)                     | 143                                     | 107         | 30         | 50         | 18         | 242                                       | 23         | 181        | 109        | 20         | 0          | 46         | 35        | 0         | 19         | 11        | 10                                              | 0         | 0         | 20        | 0         | 0         | 0         | 0         | 0         | 0         | 0         | 0                                | 0         | 0         | 0        | 0         | 0         | 0                             | 22         | 27         | 33        | 10              | 16          | 0          | 0          | 0          | 0           | 353          | 1525        |
| Staphylococcus (7)                  | 86                                      | 0           | 22         | 35         | 7          | 66                                        | 63         | 28         | 57         | 0          | 0          | 27         | 0         | 0         | 2          | 7         | 0                                               | 0         | 0         | 0         | 0         | 0         | 0         | 0         | 0         | 0         | 0         | 0                                | 0         | 0         | 0        | 0         | 0         | 14                            | 21         | 17         | 7         | 14              | 0           | 0          | 0          | 0          | 174         | 647          |             |
| Clostridiaceae (20)                 | 155                                     | 392         | 83         | 80         | 38         | 131                                       | 62         | 70         | 115        | 63         | 33         | 52         | 19        | 0         | 16         | 17        | 14                                              | 0         | 11        | 0         | 0         | 0         | 0         | 0         | 0         | 0         | 0         | 0                                | 0         | 0         | 0        | 0         | 3         | 37                            | 55         | 45         | 17        | 0               | 0           | 0          | 0          | 528        | 2036        |              |             |
| Bacteroidaceae (11)                 | 95                                      | 239         | 0          | 0          | 0          | 0                                         | 0          | 0          | 0          | 0          | 0          | 0          | 0         | 0         | 0          | 0         | 0                                               | 0         | 0         | 0         | 0         | 0         | 0         | 0         | 0         | 0         | 0         | 0                                | 0         | 0         | 0        | 0         | 0         | 0                             | 0          | 0          | 0         | 0               | 0           | 0          | 0          | 0          | 334         |              |             |
| Chlorobiales (11)                   | 16                                      | 198         | 0          | 2          | 0          | 24                                        | 0          | 0          | 0          | 0          | 1          | 0          | 0         | 0         | 0          | 0         | 0                                               | 0         | 0         | 0         | 0         | 0         | 0         | 0         | 0         | 22        | 0         | 0                                | 0         | 0         | 0        | 0         | 0         | 0                             | 0          | 0          | 0         | 0               | 0           | 0          | 0          | 0          | 0           | 263          |             |
| Corynebacteriaceae (8)              | 80                                      | 17          | 6          | 3          | 11         | 1                                         | 0          | 0          | 36         | 0          | 0          | 0          | 5         | 0         | 0          | 0         | 1                                               | 0         | 0         | 0         | 0         | 0         | 0         | 0         | 0         | 0         | 0         | 0                                | 0         | 0         | 0        | 7         | 6         | 0                             | 0          | 0          | 0         | 13              | 0           | 0          | 0          | 8          | 194         |              |             |
| Mycobacteriaceae (9)                | 53                                      | 44          | 15         | 0          | 13         | 0                                         | 0          | 0          | 50         | 0          | 0          | 0          | 9         | 0         | 3          | 0         | 14                                              | 6         | 0         | 0         | 0         | 0         | 31        | 0         | 0         | 0         | 0         | 0                                | 0         | 0         | 0        | 0         | 2         | 0                             | 0          | 0          | 0         | 0               | 0           | 0          | 7          | 247        |             |              |             |
| Cyanobacteria (14)                  | 14                                      | 43          | 0          | 0          | 4          | 2                                         | 0          | 0          | 6          | 0          | 0          | 13         | 1         | 29        | 0          | 0         | 0                                               | 0         | 0         | 0         | 0         | 0         | 0         | 0         | 0         | 0         | 0         | 0                                | 0         | 0         | 15       | 0         | 21        | 0                             | 2          | 0          | 0         | 0               | 0           | 0          | 0          | 0          | 150         |              |             |
| Chloroflexi (5)                     | 43                                      | 109         | 15         | 20         | 5          | 43                                        | 0          | 0          | 10         | 0          | 0          | 0          | 0         | 0         | 5          | 0         | 0                                               | 0         | 0         | 0         | 0         | 0         | 0         | 0         | 0         | 0         | 0         | 0                                | 0         | 0         | 0        | 10        | 0         | 0                             | 0          | 0          | 0         | 0               | 0           | 0          | 40         | 300        |             |              |             |
| Deinococcus-Thermus (5)             | 44                                      | 96          | 0          | 15         | 8          | 21                                        | 0          | 0          | 8          | 3          | 3          | 0          | 0         | 0         | 3          | 0         | 0                                               | 0         | 0         | 0         | 0         | 0         | 0         | 0         | 0         | 0         | 0         | 0                                | 0         | 0         | 0        | 8         | 0         | 0                             | 0          | 0          | 0         | 0               | 0           | 0          | 12         | 221        |             |              |             |
| Thermotogales (11)                  | 47                                      | 114         | 0          | 37         | 1          | 3                                         | 70         | 16         | 0          | 0          | 11         | 0          | 0         | 0         | 0          | 0         | 0                                               | 0         | 0         | 0         | 0         | 0         | 0         | 0         | 0         | 0         | 0         | 0                                | 0         | 0         | 0        | 22        | 30        | 23                            | 0          | 0          | 2         | 3               | 0           | 0          | 0          | 379        |             |              |             |
| Desulfovibrionales (10)             | 57                                      | 67          | 6          | 10         | 7          | 4                                         | 0          | 0          | 0          | 6          | 0          | 0          | 1         | 1         | 0          | 0         | 0                                               | 0         | 0         | 0         | 0         | 0         | 0         | 0         | 0         | 0         | 0         | 0                                | 0         | 0         | 0        | 0         | 0         | 0                             | 0          | 0          | 0         | 0               | 0           | 0          | 0          | 0          | 159         |              |             |
| Caulobacterales (4)                 | 4                                       | 28          | 20         | 1          | 4          | 0                                         | 0          | 0          | 0          | 0          | 1          | 0          | 0         | 4         | 0          | 0         | 0                                               | 0         | 0         | 0         | 0         | 0         | 0         | 0         | 0         | 0         | 0         | 0                                | 0         | 8         | 0        | 0         | 0         | 0                             | 0          | 0          | 0         | 0               | 0           | 0          | 0          | 70         |             |              |             |
| Rhodobacterales (15)                | 132                                     | 170         | 45         | 7          | 1          | 0                                         | 0          | 0          | 0          | 0          | 1          | 4          | 0         | 10        | 8          | 0         | 0                                               | 0         | 0         | 0         | 0         | 0         | 16        | 13        | 0         | 0         | 0         | 0                                | 27        | 0         | 0        | 9         | 0         | 0                             | 0          | 0          | 0         | 0               | 0           | 0          | 0          | 0          | 443         |              |             |
| Rhizobiales (15)                    | 100                                     | 159         | 57         | 12         | 3          | 0                                         | 0          | 0          | 0          | 0          | 0          | 0          | 0         | 27        | 40         | 0         | 0                                               | 0         | 0         | 0         | 0         | 0         | 30        | 0         | 0         | 0         | 0         | 0                                | 28        | 12        | 8        | 0         | 0         | 0                             | 0          | 0          | 0         | 0               | 10          | 0          | 0          | 0          | 0           | 486          |             |
| Burkholderia (8)                    | 41                                      | 140         | 38         | 9          | 12         | 0                                         | 0          | 0          | 0          | 0          | 0          | 0          | 10        | 21        | 0          | 0         | 24                                              | 0         | 0         | 0         | 0         | 0         | 0         | 0         | 0         | 0         | 0         | 0                                | 0         | 0         | 0        | 0         | 0         | 0                             | 0          | 0          | 0         | 0               | 0           | 0          | 0          | 0          | 319         |              |             |
| Ralstonia (6)                       | 30                                      | 45          | 30         | 6          | 8          | 0                                         | 0          | 0          | 0          | 1          | 0          | 0          | 0         | 3         | 8          | 0         | 0                                               | 24        | 0         | 0         | 0         | 18        | 0         | 0         | 0         | 0         | 0         | 0                                | 0         | 0         | 0        | 0         | 0         | 0                             | 0          | 0          | 0         | 0               | 0           | 0          | 0          | 0          | 0           | 173          |             |
| Enterobacteriales (12)              | 130                                     | 99          | 1          | 12         | 21         | 0                                         | 5          | 0          | 0          | 1          | 53         | 0          | 0         | 10        | 5          | 0         | 5                                               | 0         | 0         | 0         | 0         | 5         | 0         | 0         | 0         | 0         | 0         | 0                                | 0         | 0         | 0        | 12        | 0         | 0                             | 0          | 0          | 0         | 67              | 92          | 49         | 34         | 0          | 601         |              |             |
| Pasteurellales (9)                  | 59                                      | 0           | 10         | 18         | 0          | 0                                         | 10         | 0          | 0          | 0          | 39         | 24         | 0         | 0         | 0          | 0         | 0                                               | 0         | 0         | 0         | 0         | 0         | 0         | 0         | 0         | 0         | 0         | 0                                | 0         | 0         | 10       | 6         | 0         | 0                             | 0          | 0          | 0         | 0               | 0           | 0          | 258        |            |             |              |             |
| Vibrionales (10)                    | 136                                     | 39          | 10         | 8          | 22         | 0                                         | 22         | 6          | 0          | 15         | 46         | 0          | 0         | 4         | 0          | 0         | 1                                               | 0         | 0         | 0         | 0         | 0         | 0         | 0         | 0         | 0         | 0         | 0                                | 0         | 0         | 9        | 6         | 0         | 0                             | 0          | 0          | 62        | 80              | 37          | 30         | 0          | 533        |             |              |             |
| Pseudomonadaceae (8)                | 14                                      | 156         | 1          | 16         | 11         | 0                                         | 0          | 0          | 0          | 0          | 0          | 0          | 0         | 9         | 19         | 0         | 0                                               | 14        | 0         | 0         | 0         | 0         | 0         | 0         | 0         | 0         | 0         | 0                                | 0         | 0         | 8        | 0         | 0         | 0                             | 0          | 0          | 0         | 0               | 0           | 0          | 0          | 248        |             |              |             |
| Shewanella (16)                     | 155                                     | 156         | 14         | 15         | 19         | 0                                         | 48         | 7          | 0          | 20         | 119        | 0          | 0         | 7         | 0          | 0         | 0                                               | 0         | 0         | 0         | 0         | 0         | 0         | 0         | 0         | 0         | 0         | 0                                | 0         | 0         | 16       | 0         | 0         | 0                             | 0          | 0          | 96        | 126             | 64          | 48         | 0          | 910        |             |              |             |
| <b>Total</b>                        | <b>1796</b>                             | <b>2419</b> | <b>415</b> | <b>432</b> | <b>242</b> | <b>539</b>                                | <b>381</b> | <b>357</b> | <b>629</b> | <b>135</b> | <b>307</b> | <b>170</b> | <b>82</b> | <b>86</b> | <b>173</b> | <b>44</b> | <b>66</b>                                       | <b>68</b> | <b>24</b> | <b>20</b> | <b>17</b> | <b>42</b> | <b>5</b>  | <b>31</b> | <b>46</b> | <b>13</b> | <b>22</b> | <b>13</b>                        | <b>63</b> | <b>12</b> | <b>8</b> | <b>15</b> | <b>98</b> | <b>214</b>                    | <b>223</b> | <b>197</b> | <b>61</b> | <b>86</b>       | <b>250</b>  | <b>349</b> | <b>165</b> | <b>131</b> | <b>2005</b> | <b>12451</b> |             |
