# Supplementary material for: Comparative genomics of metabolic capacities of regulons controlled by cis-regulatory RNA motifs in bacteria
Source: PubMed Central journal article supplement (PMC3766115; doi:10.1186/1471-2164-14-597), 2013-09-02
Supplement: 1471-2164-14-597-S5.pdf [file 1471-2164-14-597-S5.pdf]

**Additional file 5. Classification of RNA motif-regulated genes by specific and overall functional categories (SFC and OFC).**

| <b>Riboswitch</b> | <b>SFC category</b>                | <b>Number of gene families and their names*</b> |                                                                                                                                                                                                                                                                                                                                                  | <b>OFC category</b>      |
|-------------------|------------------------------------|-------------------------------------------------|--------------------------------------------------------------------------------------------------------------------------------------------------------------------------------------------------------------------------------------------------------------------------------------------------------------------------------------------------|--------------------------|
| Cobalamin         | B12 & precursor transporters       | 26                                              | btuB, btuF, btuC, btuD, btuT, btuM, btuU, btuV, btuN, btuX, btuY, cblT, cbrV, cbrU, cbrT, RoseRS_3102, RoseRS_3101, RoseRS_3100, Pjdr2_2686, Pjdr2_2687, Pjdr2_2688, btuB2-btuM, btuR, btuD-cbiZ                                                                                                                                                 | 2. Coenzyme uptake       |
| Cobalamin         | B12 biosynthesis                   | 43                                              | cobD, cobC, cobU, cobS, cobT, btuR, pduO, cbiP, cbiB, cblS, pduX, cobG, cobE, cobF, cysG, cblL, cbiH, cbiG, cbiF, cbiD, cbiJ, cbiE, cbiT, cbiC, cbiA, cbiX, cbiK, cobN, chlI, chlD, cbiET, cbiGH, cbiGF, cbiHC, cbiHJ, cbiID, cbiKL, cbiOP, cbiP-cobU, cbiXC, chlID, cbtA, cbtB, cbtC, cbtD, cbtG, hoxN, cbiM, cbiN, cbiQ, cbiO, hupE, Ssed_2094 | 1. Coenzyme metabolism   |
| Cobalamin         | Cobalt transporters                | 12                                              |                                                                                                                                                                                                                                                                                                                                                  | 6. Metal homeostasis     |
| Cobalamin         | Isozymes of B12-dependent enzymes  | 13                                              | nrdA, nrdB, nrdD, nrdG, nrdE, nrdF, nrdH, nrdI, metE, metF, ardX, frdX, achX                                                                                                                                                                                                                                                                     | 10. Miscellaneous        |
| FMN               | Riboflavin biosynthesis            | 7                                               | ribD, ribE, ribB, ribA, ribH, ribBA, ribBH                                                                                                                                                                                                                                                                                                       | 1. Coenzyme metabolism   |
| FMN               | Riboflavin transporters            | 5                                               | ribU, impX, pnuX, ribX, ribY                                                                                                                                                                                                                                                                                                                     | 2. Coenzyme uptake       |
| GEMM              | Polysaccharide degradation         | 4                                               | chiA, cbp, Deide_1p01370, licB                                                                                                                                                                                                                                                                                                                   | 10. Miscellaneous        |
| glmS              | Aminosugar biosynthesis            | 1                                               | glmS                                                                                                                                                                                                                                                                                                                                             | 5. Secondary metabolism  |
| Glycine           | Glycine metabolism                 | 12                                              | grdB, grdE, grdX, grdA, grdC, grdD, glyA, abgB, gcvT, gcvH, gcvP, gcvB                                                                                                                                                                                                                                                                           | 3. Amino acid metabolism |
| Glycine           | Glycine transporters               | 3                                               | glyP, ydgF, potE                                                                                                                                                                                                                                                                                                                                 | 4. Amino acid uptake     |
| Glycine           | Serine metabolism                  | 3                                               | sdaA, serC, serA                                                                                                                                                                                                                                                                                                                                 | 3. Amino acid metabolism |
| His leader        | Histidine biosynthesis             | 8                                               | hisG, hisD, hisC, hisB, hisH, hisA, hisF, hisI                                                                                                                                                                                                                                                                                                   | 3. Amino acid metabolism |
| His leader        | Histidine transporters             | 4                                               | hisJ, hisM, hisL, yuiF                                                                                                                                                                                                                                                                                                                           | 4. Amino acid uptake     |
| L10 leader        | Ribosome biogenesis                | 2                                               | rplJ, rplL                                                                                                                                                                                                                                                                                                                                       | 9. Protein synthesis     |
| L13 leader        | Ribosome biogenesis                | 2                                               | rplM, rpsI                                                                                                                                                                                                                                                                                                                                       | 9. Protein synthesis     |
| L19 leader        | Ribosome biogenesis                | 1                                               | rplS                                                                                                                                                                                                                                                                                                                                             | 9. Protein synthesis     |
| L20 leader        | Ribosome biogenesis                | 3                                               | infC, rpml, rplT                                                                                                                                                                                                                                                                                                                                 | 9. Protein synthesis     |
| L21 leader        | Ribosome biogenesis                | 4                                               | rplU, rpmA, rplM, rpsI                                                                                                                                                                                                                                                                                                                           | 9. Protein synthesis     |
| Leu leader        | Leucine biosynthesis               | 4                                               | leuA, leuB, leuC, leuD                                                                                                                                                                                                                                                                                                                           | 3. Amino acid metabolism |
| Lysine            | Lysine biosynthesis                | 11                                              | lysC, asd, dapF, dapA, dapB, dapD, dapL, dapX, lysA, argD, patA                                                                                                                                                                                                                                                                                  | 3. Amino acid metabolism |
| Lysine            | Lysine transporters                | 8                                               | lysW, lysP, yvsH, lysX, lysY, Clos_0722, Clos_0723, Clos_0724                                                                                                                                                                                                                                                                                    | 4. Amino acid uptake     |
| Mg sensor         | Magnesium transporters             | 1                                               | mgtA                                                                                                                                                                                                                                                                                                                                             | 6. Metal homeostasis     |
| mini-ykkC         | Multidrug resistance transporter   | 1                                               | ykkC                                                                                                                                                                                                                                                                                                                                             | 10. Miscellaneous        |
| mini-ykkC         | Urea and agmatine utilization      | 3                                               | ucaA, ucaB, amt                                                                                                                                                                                                                                                                                                                                  | 5. Secondary metabolism  |
| MOCO              | Molybdenum & tungsten transporters | 6                                               | modA, modB, modC, tupA, tupB, tupC                                                                                                                                                                                                                                                                                                               | 6. Metal homeostasis     |
| MOCO              | Molybdenum cofactor biosynthesis   | 8                                               | moaA, moaB, moaC, moaD, moaE, mobA, mobB, moeA                                                                                                                                                                                                                                                                                                   | 1. Coenzyme metabolism   |
| preQ1             | Queuosine & precursor transporters | 3                                               | ypdP, queT, qrtT                                                                                                                                                                                                                                                                                                                                 | 2. Coenzyme uptake       |
| preQ1             | Queuosine biosynthesis             | 4                                               | queC, queD, queE, queF                                                                                                                                                                                                                                                                                                                           | 1. Coenzyme metabolism   |
| preQ1-II          | Queuosine & precursor transporters | 1                                               | queT                                                                                                                                                                                                                                                                                                                                             | 2. Coenzyme uptake       |
| Purine            | Purine & precursor transporters    | 6                                               | pbuG, pbuO, pbuX, nupG, pbuE                                                                                                                                                                                                                                                                                                                     | 8. Nucleotide uptake     |
| Purine            | Purine metabolism                  | 18                                              | guaB, guaA, guaD, purE, purK, purB, purC, purS, purQ, purL, purF, purM, purN, purH, purD, adeC, add, xpt                                                                                                                                                                                                                                         | 7. Nucleotide metabolism |
| PyrR              | Pyrimidine metabolism              | 14                                              | pyrR, pyrP, pyrB, pyrC, carA, carB, pyrK, pyrD, pyrF, pyrE, pyrG, pyrI, ntd, codA                                                                                                                                                                                                                                                                | 7. Nucleotide metabolism |
| PyrR              | Pyrimidine transporters            | 1                                               | codB                                                                                                                                                                                                                                                                                                                                             | 8. Nucleotide uptake     |
| S15 leader        | Ribosome biogenesis                | 1                                               | rpsO                                                                                                                                                                                                                                                                                                                                             | 9. Protein synthesis     |
| SAH               | Methionine & SAM recycling         | 1                                               | ahcY                                                                                                                                                                                                                                                                                                                                             | 3. Amino acid metabolism |
| SAH               | Methionine biosynthesis            | 2                                               | metF, metH                                                                                                                                                                                                                                                                                                                                       | 3. Amino acid metabolism |
| SAM               | Cysteine biosynthesis              | 13                                              | cysH, sat, cysC, cysI, sirB, sirC, cysG, cysK, cysP, sbpA, cysT, cysW, cysA                                                                                                                                                                                                                                                                      | 3. Amino acid metabolism |
| SAM               | Methionine & SAM recycling         | 11                                              | metK, mtmK, mtmN, mtmW, mtmX, mtmB, mtmD, rhc, ahcY, mmuP, mtmE                                                                                                                                                                                                                                                                                  | 3. Amino acid metabolism |
| SAM               | Methionine biosynthesis            | 11                                              | metX, metY, metA, metE, metF, metH, metI, metC, hom, bhmT, msd                                                                                                                                                                                                                                                                                   | 3. Amino acid metabolism |
| SAM               | Methionine transporters            | 4                                               | metN, metP, metQ, metT                                                                                                                                                                                                                                                                                                                           | 4. Amino acid uptake     |
| SAM-Alpha         | Methionine biosynthesis            | 6                                               | metY, metX, metW, metA, hom, metC                                                                                                                                                                                                                                                                                                                | 3. Amino acid metabolism |
| SAM-Chlorobi      | Methionine & SAM recycling         | 1                                               | metK                                                                                                                                                                                                                                                                                                                                             | 3. Amino acid metabolism |
| SAM-Chlorobi      | Methionine & SAM recycling         | 1                                               | ahcY                                                                                                                                                                                                                                                                                                                                             | 3. Amino acid metabolism |
| SAM-IV            | Methionine biosynthesis            | 2                                               | metY, metX                                                                                                                                                                                                                                                                                                                                       | 3. Amino acid metabolism |
| SAM-SAH           | Methionine & SAM recycling         | 1                                               | metK                                                                                                                                                                                                                                                                                                                                             | 3. Amino acid metabolism |
| serC              | Serine metabolism                  | 2                                               | serC, serA                                                                                                                                                                                                                                                                                                                                       | 3. Amino acid metabolism |
| SMK_box           | Methionine & SAM recycling         | 1                                               | metK                                                                                                                                                                                                                                                                                                                                             | 3. Amino acid metabolism |
| speF              | Ornithine degradation              | 1                                               | speF                                                                                                                                                                                                                                                                                                                                             | 3. Amino acid metabolism |
| sucA              | Citric acid cycle                  | 3                                               | sucA, sucB, lpdA                                                                                                                                                                                                                                                                                                                                 | 5. Secondary metabolism  |

|            |                                   |    |                                                                                                                                                                                                                                                                                                                                                                                              |                          |
|------------|-----------------------------------|----|----------------------------------------------------------------------------------------------------------------------------------------------------------------------------------------------------------------------------------------------------------------------------------------------------------------------------------------------------------------------------------------------|--------------------------|
| T-box      | Amino acid biosynthesis           | 64 | argG, argF, argC, argJ, argB, argD, argH, asnA, asnB, cysE, cysK, mccB, mccA, hisC, hisZ, hisG, hisD, hisB, hisH, hisA, hisF, hisI, hisE, hisK, ilvE, ilvB, ilvH, ilvC, ilvD, ilvA, leuA, leuB, leuC, leuD, asd, metA, metB, metY, hom, metI, metC, metF, metE, yxjH, mmuM, proB, proA, prol, serA, yurG, thrC, thrB, trpE, trpG, trpD, trpC, trpF, trpB, trpA, tyrA, aroA, aroF, aroE, phhA | 3. Amino acid metabolism |
| T-box      | Amino acid transporters           | 29 | artP, artQ, artM, glnQ, glnH, glnM, glnP, tcyA, tcyB, tcyC, cysP, hisZ, hisX, hisY, brnQ, yvbW, yocR, lysX, metQ, metN, metP, ansP, ykbA, yhdH, trpX, trpY, trpZ, trpP, tyrT                                                                                                                                                                                                                 | 4. Amino acid uptake     |
| T-box      | Amino acyl-tRNA synthetases       | 27 | alaS, asnS, aspS, gatC, gatA, gatB, argS, hisS, cysS, glyQ, glyS, ileS, leuS, lysS, lysU, glnS, metS, pheS, pheT, proS, serS, thrS, thrZ, trpS, tyrS, tyrZ, valS                                                                                                                                                                                                                             | 9. Protein synthesis     |
| THF        | Folate biosynthesis               | 1  | folC                                                                                                                                                                                                                                                                                                                                                                                         | 1. Coenzyme metabolism   |
| THF        | Folate transporters               | 1  | folT                                                                                                                                                                                                                                                                                                                                                                                         | 2. Coenzyme uptake       |
| Thr leader | Threonine biosynthesis            | 3  | thrA, thrB, thrC                                                                                                                                                                                                                                                                                                                                                                             | 3. Amino acid metabolism |
| TPP        | Thiamine & precursor transporters | 19 | thiX, thiY, thiZ, ykoF, ykoE, ykoD, ykoC, cytX, thiU, thiW, ecfA, ecfT, thiT, pnuT, thiB, thiP, thiQ, omp_thi, thiW-ecfAA                                                                                                                                                                                                                                                                    | 2. Coenzyme uptake       |
| TPP        | Thiamine biosynthesis             | 20 | tenA, tenI, thiC, thiD, thiE, thiS, thiF, thiG, thiH, thiO, thiM, thiN, thi4, tnr3, thiK, thiDE, thiDN, thiD-tenA, thiED-tenA, thiOS                                                                                                                                                                                                                                                         | 1. Coenzyme metabolism   |
| Trp leader | Tryptophan biosynthesis           | 7  | aroA, trpE, trpG, trpD, trpC, trpB, trpA                                                                                                                                                                                                                                                                                                                                                     | 3. Amino acid metabolism |
| ybhL       | Miscellaneous                     | 1  | ybhL                                                                                                                                                                                                                                                                                                                                                                                         | 10. Miscellaneous        |
| ydaO-yuaA  | Potassium transporters            | 6  | ktrA, ktrB, kdpA, kdpB, kdpC, kdpD                                                                                                                                                                                                                                                                                                                                                           | 6. Metal homeostasis     |
| ykkC-yxkD  | Multidrug resistance transporter  | 2  | ykkC, ykkD                                                                                                                                                                                                                                                                                                                                                                                   | 10. Miscellaneous        |
| ykkC-yxkD  | Urea and agmatine utilization     | 9  | ucaA, ucaB, speB, hypA, hypB, amt, uctB, uctP, uctA,                                                                                                                                                                                                                                                                                                                                         | 5. Secondary metabolism  |
| ykoK       | Magnesium transporters            | 4  | mgtE, mgtB, corA, mntH                                                                                                                                                                                                                                                                                                                                                                       | 6. Metal homeostasis     |
| ylbH       | Miscellaneous                     | 2  | ylbH, coaD                                                                                                                                                                                                                                                                                                                                                                                   | 10. Miscellaneous        |
| yybP-ykoY  | Miscellaneous                     | 18 | yybP, ykoY, ykoX, atcL, yrzF, COG2119, COG1971, COG3339, COG0530, COG1321, htpX, Cbei_1147, CPF_0680, CBO2022, CPF_0825, yugP, TTC0541, Mvan_0329                                                                                                                                                                                                                                            | 10. Miscellaneous        |

\*only genes with annotated functional roles in the RegPrecise database are shown under 'gene name';  
number of gene families indicates the total types of different orthologues found
