# Supplementary material for: Comparative genomics of metabolic capacities of regulons controlled by cis-regulatory RNA motifs in bacteria
Source: BMC Genomics. 2013 Sep 2;14:597. doi: 10.1186/1471-2164-14-597 (PMC3766115; doi:10.1186/1471-2164-14-597)
Supplement: Additional file 3 — Distribution of RNA motifs in microbial genomes. Riboswitches are arranged in six groups according to abundance and substrate types. [file 1471-2164-14-597-S3.pdf]

Additional File 3. Distribution of RNA motifs in microbial genomes.

| Taxonomic collection | Genomes | Group A - Widely distributed RNA motifs |           |         |     |           | Group B<br>Moderately distributed RNA motifs |        |        |      |      |      |       |           |           |           | Group C<br>Phylogenetically restrictive RNA motifs |      |     |                                                                                                                                                                    |      |          |      |           |        |     | Group D<br>Ribosomal operon leaders |         |     |          |         |      | Group E - a.a.<br>operon leaders |      |      |     | Group F<br>T-boxes |     |     |     |     |     |     |      |     |          |  |  |  |
|----------------------|---------|-----------------------------------------|-----------|---------|-----|-----------|----------------------------------------------|--------|--------|------|------|------|-------|-----------|-----------|-----------|----------------------------------------------------|------|-----|--------------------------------------------------------------------------------------------------------------------------------------------------------------------|------|----------|------|-----------|--------|-----|-------------------------------------|---------|-----|----------|---------|------|----------------------------------|------|------|-----|--------------------|-----|-----|-----|-----|-----|-----|------|-----|----------|--|--|--|
|                      |         | TPP                                     | Cobalamin | Glycine | FMN | yybP-ykoY | SAM                                          | Lysine | Purine | PyrR | GEMM | MOCO | PreQ1 | ydaO-yuaA | mini-ykkC | ykkC-ykkD | glmS                                               | ykoK | SAH | THF                                                                                                                                                                | yibH | preQ1-II | sucA | Mg sensor | SAM-IV | SAM | alpha                               | SAM-SAH | SAM | Chlorobi | Smk box | serC | speF                             | ybhL | glnA | S15 | L10                | L20 | L21 | L19 | L13 | Trp | His | Leu  | Thr | *T-boxes |  |  |  |
|                      |         |                                         |           |         |     |           |                                              |        |        |      |      |      |       |           |           |           |                                                    |      |     |                                                                                                                                                                    |      |          |      |           |        |     |                                     |         |     |          |         |      |                                  |      |      |     |                    |     |     |     |     |     |     |      |     |          |  |  |  |
| Lactobacillaceae     | 15      | 36                                      | 1         | 0       | 19  | 13        | 2                                            | 25     | 18     | 49   | 0    | 0    | 9     | 0         | 0         | 2         | 1                                                  | 10   | 0   | 8                                                                                                                                                                  | 0    | 3        | 0    | 0         | 0      | 0   | 0                                   | 0       | 0   | 13       | 0       | 0    | 0                                | 0    | 9    | 15  | 15                 | 15  | 14  | 13  | 0   | 0   | 0   | 0    | 291 |          |  |  |  |
| Streptococcaceae     | 15      | 23                                      | 0         | 18      | 19  | 15        | 0                                            | 4      | 11     | 54   | 0    | 0    | 2     | 0         | 0         | 0         | 0                                                  | 5    | 0   | 4                                                                                                                                                                  | 0    | 14       | 0    | 0         | 0      | 0   | 0                                   | 0       | 0   | 0        | 0       | 0    | 0                                | 15   | 15   | 15  | 15                 | 13  | 15  | 0   | 0   | 0   | 0   | 143  |     |          |  |  |  |
| Bacillales           | 11      | 47                                      | 18        | 22      | 20  | 16        | 98                                           | 23     | 49     | 31   | 9    | 0    | 15    | 18        | 0         | 11        | 11                                                 | 7    | 0   | 0                                                                                                                                                                  | 10   | 0        | 0    | 0         | 0      | 0   | 0                                   | 0       | 0   | 0        | 0       | 0    | 0                                | 0    | 11   | 9   | 11                 | 10  | 8   | 0   | 0   | 0   | 0   | 214  |     |          |  |  |  |
| Staphylococcaceae    | 7       | 30                                      | 0         | 8       | 14  | 7         | 40                                           | 15     | 7      | 13   | 0    | 0    | 13    | 0         | 0         | 1         | 7                                                  | 0    | 0   | 0                                                                                                                                                                  | 0    | 0        | 0    | 0         | 0      | 0   | 0                                   | 0       | 0   | 0        | 0       | 0    | 0                                | 0    | 7    | 7   | 6                  | 7   | 7   | 0   | 0   | 0   | 0   | 99   |     |          |  |  |  |
| Clostridiaceae       | 20      | 62                                      | 50        | 52      | 38  | 35        | 72                                           | 38     | 41     | 45   | 29   | 6    | 23    | 18        | 0         | 11        | 17                                                 | 10   | 0   | 11                                                                                                                                                                 | 0    | 0        | 0    | 0         | 0      | 0   | 0                                   | 0       | 0   | 0        | 0       | 0    | 0                                | 3    | 19   | 9   | 15                 | 17  | 0   | 0   | 0   | 0   | 0   | 337  |     |          |  |  |  |
| Bacteroidaceae       | 11      | 19                                      | 65        | 0       | 0   | 0         | 0                                            | 0      | 0      | 0    | 0    | 0    | 0     | 0         | 0         | 0         | 0                                                  | 0    | 0   | 0                                                                                                                                                                  | 0    | 0        | 0    | 0         | 0      | 0   | 0                                   | 0       | 0   | 0        | 0       | 0    | 0                                | 0    | 0    | 0   | 0                  | 0   | 0   | 0   | 0   | 0   | 0   | 0    |     |          |  |  |  |
| Chlorobiales         | 11      | 11                                      | 34        | 0       | 2   | 0         | 14                                           | 0      | 0      | 0    | 0    | 1    | 0     | 0         | 0         | 0         | 0                                                  | 0    | 0   | 0                                                                                                                                                                  | 0    | 0        | 0    | 0         | 0      | 0   | 0                                   | 11      | 0   | 0        | 0       | 0    | 0                                | 0    | 0    | 0   | 0                  | 0   | 0   | 0   | 0   | 0   | 0   | 0    | 0   |          |  |  |  |
| Corynebacteriaceae   | 8       | 23                                      | 6         | 4       | 3   | 10        | 1                                            | 0      | 0      | 6    | 0    | 0    | 0     | 5         | 0         | 0         | 0                                                  | 1    | 0   | 0                                                                                                                                                                  | 0    | 0        | 0    | 0         | 0      | 0   | 0                                   | 0       | 0   | 0        | 0       | 0    | 0                                | 7    | 3    | 0   | 0                  | 0   | 0   | 3   | 0   | 0   | 0   | 8    |     |          |  |  |  |
| Mycobacteriaceae     | 9       | 22                                      | 21        | 19      | 0   | 13        | 0                                            | 0      | 0      | 8    | 0    | 0    | 0     | 9         | 0         | 3         | 0                                                  | 9    | 6   | 0                                                                                                                                                                  | 0    | 0        | 0    | 0         | 13     | 0   | 0                                   | 0       | 0   | 0        | 0       | 0    | 0                                | 0    | 0    | 1   | 0                  | 0   | 0   | 0   | 0   | 0   | 0   | 0    | 7   |          |  |  |  |
| Cyanobacteria        | 14      | 14                                      | 20        | 0       | 0   | 4         | 2                                            | 0      | 0      | 0    | 6    | 0    | 0     | 8         | 1         | 6         | 0                                                  | 0    | 0   | 0                                                                                                                                                                  | 0    | 0        | 0    | 0         | 0      | 0   | 0                                   | 0       | 0   | 0        | 0       | 0    | 0                                | 0    | 11   | 0   | 1                  | 0   | 0   | 0   | 0   | 0   | 0   | 0    |     |          |  |  |  |
| Chloroflexi          | 5       | 14                                      | 13        | 6       | 8   | 5         | 14                                           | 0      | 0      | 3    | 0    | 0    | 0     | 0         | 0         | 0         | 5                                                  | 0    | 0   | 0                                                                                                                                                                  | 0    | 0        | 0    | 0         | 0      | 0   | 0                                   | 0       | 0   | 0        | 0       | 0    | 0                                | 0    | 5    | 0   | 0                  | 0   | 0   | 0   | 0   | 0   | 0   | 25   |     |          |  |  |  |
| Deinococcus-Therm    | 5       | 10                                      | 12        | 0       | 5   | 5         | 9                                            | 0      | 0      | 2    | 3    | 1    | 0     | 0         | 0         | 0         | 3                                                  | 0    | 0   | 0                                                                                                                                                                  | 0    | 0        | 0    | 0         | 0      | 0   | 0                                   | 0       | 0   | 0        | 0       | 0    | 0                                | 0    | 4    | 0   | 0                  | 0   | 0   | 0   | 0   | 0   | 0   | 10   |     |          |  |  |  |
| Thermotogales        | 11      | 16                                      | 20        | 0       | 8   | 1         | 1                                            | 9      | 2      | 0    | 0    | 2    | 0     | 0         | 0         | 0         | 0                                                  | 0    | 0   | 0                                                                                                                                                                  | 0    | 0        | 0    | 0         | 0      | 0   | 0                                   | 0       | 0   | 0        | 0       | 0    | 0                                | 11   | 10   | 4   | 0                  | 0   | 3   | 1   | 0   | 0   | 0   |      |     |          |  |  |  |
| Desulfovibrionales   | 10      | 21                                      | 23        | 6       | 10  | 7         | 4                                            | 0      | 0      | 0    | 5    | 0    | 0     | 1         | 1         | 0         | 0                                                  | 0    | 0   | 0                                                                                                                                                                  | 0    | 0        | 0    | 0         | 0      | 0   | 0                                   | 0       | 0   | 0        | 0       | 0    | 0                                | 0    | 0    | 0   | 0                  | 0   | 0   | 0   | 0   | 0   | 0   | 0    |     |          |  |  |  |
| Caulobacterales      | 4       | 4                                       | 7         | 11      | 1   | 4         | 0                                            | 0      | 0      | 0    | 0    | 1    | 0     | 0         | 4         | 0         | 0                                                  | 0    | 0   | 0                                                                                                                                                                  | 0    | 0        | 0    | 0         | 0      | 0   | 0                                   | 0       | 0   | 0        | 0       | 0    | 0                                | 0    | 0    | 0   | 0                  | 0   | 0   | 0   | 0   | 0   | 0   | 0    |     |          |  |  |  |
| Rhodobacterales      | 15      | 30                                      | 48        | 31      | 7   | 1         | 0                                            | 0      | 0      | 0    | 0    | 1    | 1     | 0         | 10        | 3         | 0                                                  | 0    | 0   | 0                                                                                                                                                                  | 0    | 0        | 0    | 0         | 14     | 13  | 0                                   | 0       | 14  | 0        | 0       | 0    | 9                                | 0    | 0    | 0   | 0                  | 0   | 0   | 0   | 0   | 0   | 0   | 0    | 0   | 0        |  |  |  |
| Rhizobiales          | 15      | 30                                      | 57        | 36      | 12  | 3         | 0                                            | 0      | 0      | 0    | 0    | 0    | 0     | 0         | 12        | 7         | 0                                                  | 0    | 0   | 0                                                                                                                                                                  | 0    | 0        | 0    | 25        | 0      | 0   | 0                                   | 0       | 14  | 12       | 8       | 0    | 0                                | 0    | 0    | 0   | 0                  | 0   | 0   | 5   | 0   | 0   | 0   | 0    | 0   |          |  |  |  |
| Burkholderia         | 8       | 18                                      | 38        | 20      | 9   | 12        | 0                                            | 0      | 0      | 0    | 0    | 0    | 0     | 0         | 9         | 5         | 0                                                  | 0    | 8   | 0                                                                                                                                                                  | 0    | 0        | 8    | 0         | 0      | 0   | 0                                   | 0       | 0   | 0        | 0       | 0    | 0                                | 0    | 0    | 0   | 0                  | 0   | 0   | 0   | 0   | 0   | 0   | 0    | 0   |          |  |  |  |
| Ralstonia            | 6       | 6                                       | 7         | 22      | 6   | 8         | 0                                            | 0      | 0      | 0    | 1    | 0    | 0     | 0         | 2         | 2         | 0                                                  | 0    | 6   | 0                                                                                                                                                                  | 0    | 6        | 0    | 0         | 0      | 0   | 0                                   | 0       | 0   | 0        | 0       | 0    | 0                                | 0    | 0    | 0   | 0                  | 0   | 0   | 0   | 0   | 0   | 0   | 0    | 0   |          |  |  |  |
| Enterobacteriales    | 12      | 38                                      | 16        | 2       | 12  | 21        | 0                                            | 5      | 0      | 0    | 1    | 12   | 0     | 0         | 10        | 1         | 0                                                  | 5    | 0   | 0                                                                                                                                                                  | 0    | 0        | 5    | 0         | 0      | 0   | 0                                   | 0       | 0   | 0        | 0       | 0    | 0                                | 12   | 0    | 0   | 0                  | 0   | 0   | 12  | 12  | 12  | 12  | 0    |     |          |  |  |  |
| Pasteurellales       | 9       | 20                                      | 0         | 18      | 9   | 0         | 0                                            | 10     | 0      | 0    | 0    | 12   | 9     | 0         | 0         | 0         | 0                                                  | 0    | 0   | 0                                                                                                                                                                  | 0    | 0        | 0    | 0         | 0      | 0   | 0                                   | 0       | 0   | 0        | 0       | 0    | 10                               | 3    | 0    | 0   | 0                  | 0   | 0   | 9   | 5   | 7   | 0   |      |     |          |  |  |  |
| Vibrionales          | 10      | 30                                      | 13        | 20      | 8   | 22        | 0                                            | 22     | 6      | 0    | 15   | 10   | 0     | 0         | 3         | 0         | 0                                                  | 1    | 0   | 0                                                                                                                                                                  | 0    | 0        | 0    | 0         | 0      | 0   | 0                                   | 0       | 0   | 0        | 0       | 0    | 9                                | 3    | 0    | 0   | 0                  | 0   | 10  | 10  | 10  | 10  | 0   |      |     |          |  |  |  |
| Pseudomonadaceae     | 8       | 9                                       | 33        | 2       | 8   | 11        | 0                                            | 0      | 0      | 0    | 0    | 0    | 0     | 0         | 8         | 6         | 0                                                  | 0    | 7   | 0                                                                                                                                                                  | 0    | 0        | 0    | 0         | 0      | 0   | 0                                   | 0       | 0   | 0        | 0       | 0    | 8                                | 0    | 0    | 0   | 0                  | 0   | 0   | 0   | 0   | 0   | 0   | 0    |     |          |  |  |  |
| Shewanella           | 16      | 31                                      | 34        | 27      | 15  | 19        | 0                                            | 35     | 7      | 0    | 20   | 16   | 0     | 0         | 7         | 0         | 0                                                  | 0    | 0   | 0                                                                                                                                                                  | 0    | 0        | 0    | 0         | 0      | 0   | 0                                   | 0       | 0   | 0        | 0       | 0    | 16                               | 0    | 0    | 0   | 0                  | 0   | 16  | 16  | 16  | 16  | 0   |      |     |          |  |  |  |
| TOTAL                | 255     | 564                                     | 536       | 324     | 233 | 232       | 257                                          | 186    | 141    | 211  | 89   | 62   | 72    | 59        | 67        | 58        | 44                                                 | 48   | 27  | 23                                                                                                                                                                 | 10   | 17       | 14   | 5         | 13     | 39  | 13                                  | 11      | 13  | 32       | 12      | 8    | 13                               | 98   | 108  | 75  | 67                 | 61  | 43  | 49  | 48  | 43  | 45  | 1134 |     |          |  |  |  |
| number of regulogs   | 24      | 24                                      | 21        | 18      | 21  | 21        | 11                                           | 10     | 8      | 9    | 9    | 10   | 7     | 6         | 11        | 12        | 6                                                  | 8    | 4   | 3                                                                                                                                                                  | 1    | 2        | 2    | 1         | 1      | 2   | 1                                   | 1       | 1   | 3        | 1       | 1    | 1                                | 10   | 13   | 6   | 7                  | 5   | 4   | 6   | 5   | 4   | 4   | 9    |     |          |  |  |  |
| *T-boxes             | Genomes | Ala                                     | Arg       | Asn     | Asp | Cys       | Gly                                          | His    | Ile    | Leu  | Lys  | Met  | Phe   | Pro       | Ser       | Thr       | Trp                                                | Tyr  | Val | Note: riboswitches are arranged according to abundance and substrate types.<br>Number of lineages indicates the number of taxa in which a riboswitch can be found. |      |          |      |           |        |     |                                     |         |     |          |         |      |                                  |      |      |     |                    |     |     |     |     |     |     |      |     |          |  |  |  |
| Lactobacillaceae     | 15      | 15                                      | 14        | 13      | 16  | 1         | 15                                           | 4      | 28     | 16   | 1    | 54   | 15    | 3         | 15        | 16        | 15                                                 | 29   | 21  |                                                                                                                                                                    |      |          |      |           |        |     |                                     |         |     |          |         |      |                                  |      |      |     |                    |     |     |     |     |     |     |      |     |          |  |  |  |
| Streptococcaceae     | 15      | 15                                      | 0         | 3       | 2   | 0         | 15                                           | 7      | 15     | 0    | 0    | 2    | 15    | 0         | 15        | 15        | 24                                                 | 0    | 15  |                                                                                                                                                                    |      |          |      |           |        |     |                                     |         |     |          |         |      |                                  |      |      |     |                    |     |     |     |     |     |     |      |     |          |  |  |  |
| Bacillales           | 11      | 10                                      | 2         | 8       | 5   | 11        | 9                                            | 0      | 16     | 29   | 7    | 6    | 11    | 21        | 13        | 20        | 17                                                 | 19   | 10  |                                                                                                                                                                    |      |          |      |           |        |     |                                     |         |     |          |         |      |                                  |      |      |     |                    |     |     |     |     |     |     |      |     |          |  |  |  |
| Staphylococcaceae    | 7       | 7                                       | 7         | 7       | 0   | 7         | 7                                            | 0      | 7      | 7    | 0    | 8    | 6     | 0         | 7         | 9         | 6                                                  | 8    | 6   |                                                                                                                                                                    |      |          |      |           |        |     |                                     |         |     |          |         |      |                                  |      |      |     |                    |     |     |     |     |     |     |      |     |          |  |  |  |
| Clostridiaceae       | 20      | 20                                      | 21        | 24      | 4   | 21        | 10                                           | 3      | 29     | 30   | 1    | 19   | 22    | 16        | 16        | 22        | 41                                                 | 16   | 22  |                                                                                                                                                                    |      |          |      |           |        |     |                                     |         |     |          |         |      |                                  |      |      |     |                    |     |     |     |     |     |     |      |     |          |  |  |  |
| Bacteroidaceae       | 11      | 0                                       | 0         | 0       | 0   | 0         | 0                                            | 0      | 0      | 0    | 0    | 0    | 0     | 0         | 0         | 0         | 0                                                  | 0    | 0   |                                                                                                                                                                    |      |          |      |           |        |     |                                     |         |     |          |         |      |                                  |      |      |     |                    |     |     |     |     |     |     |      |     |          |  |  |  |
| Chlorobiales         | 11      | 0                                       | 0         | 0       | 0   | 0         | 0                                            | 0      | 0      | 0    | 0    | 0    | 0     | 0         | 0         | 0         | 0                                                  | 0    | 0   |                                                                                                                                                                    |      |          |      |           |        |     |                                     |         |     |          |         |      |                                  |      |      |     |                    |     |     |     |     |     |     |      |     |          |  |  |  |
| Corynebacteriaceae   | 8       | 0                                       | 0         | 0       | 0   | 0         | 0                                            | 0      | 8      | 0    | 0    | 0    | 0     | 0         | 0         | 0         | 0                                                  | 0    | 0   |                                                                                                                                                                    |      |          |      |           |        |     |                                     |         |     |          |         |      |                                  |      |      |     |                    |     |     |     |     |     |     |      |     |          |  |  |  |
| Mycobacteriaceae     | 9       | 0                                       | 0         | 0       | 0   | 0         | 0                                            | 0      | 7      | 0    | 0    | 0    | 0     | 0         | 0         | 0         | 0                                                  | 0    | 0   |                                                                                                                                                                    |      |          |      |           |        |     |                                     |         |     |          |         |      |                                  |      |      |     |                    |     |     |     |     |     |     |      |     |          |  |  |  |
| Cyanobacteria</      |         |                                         |           |         |     |           |                                              |        |        |      |      |      |       |           |           |           |                                                    |      |     |                                                                                                                                                                    |      |          |      |           |        |     |                                     |         |     |          |         |      |                                  |      |      |     |                    |     |     |     |     |     |     |      |     |          |  |  |  |
